# Supplementary material for: The establishment of new protein expression system using N starvation inducible promoters in Chlorella
Source: PubMed Central journal article supplement (PMC7391781; doi:10.1038/s41598-020-69620-9), 2020-07-29
Supplement: 41598_2020_69620_MOESM1_ESM.pdf [file 41598_2020_69620_MOESM1_ESM.pdf]

**The establishment of new protein expression system using N starvation inducible promoters  
in *Chlorella***

Jun-Hye Shin<sup>1</sup>, Juyoung Choi<sup>1</sup>, Jeongmin Jeon<sup>1</sup>, Manu Kumar<sup>1</sup>, Juhyeon Lee<sup>1</sup>, Won-Joong Jeong<sup>2</sup>, Seong-Ryong Kim<sup>1\*</sup>

<sup>1</sup>Department of Life Science, Sogang University, Seoul, South Korea

<sup>2</sup>Korea Research Institute of Bioscience and Biotechnology, Daejeon, South Korea

Supplementary Table 1. Genes up-regulated by nitrogen starvation obtained from differential expression (DE) analysis using RNA-seq data.

| Genes                     | Functional description                                                      | log2FoldChange |
|---------------------------|-----------------------------------------------------------------------------|----------------|
|                           |                                                                             | 29B_vs_N_3d    |
| <i>scaffold275G00200</i>  | amino acid permease (XP_002327371, 2.01E-35)                                | 20.835         |
| <i>scaffold326G00920</i>  | urea active transporter-like protein (XP_005645091, 0.00E+00)               | 11.699         |
| <i>scaffold37G001690</i>  | ammonium transporter (XP_002314518, 1.77E-44)                               | 11.639         |
| <i>scaffold164G00210</i>  | nitrate transporter NTR (AAK02066, 0.00E+00)                                | 10.301         |
| <i>scaffold326G00270</i>  | ammonium transporter (AFV36360, 0.00E+00)                                   | 10.096         |
| <i>scaffold326G00910</i>  | urea carboxylase (XP_005643671, 0.00E+00)                                   | 9.862          |
| <i>scaffold73G00080</i>   | GOGAT, glutamate synthase (EMS25597, 0.00E+00)                              | 9.749          |
| <i>scaffold253G00910</i>  | acylamide amidohydrolase (WP_019722123, 5.22E-155)                          | 9.394          |
| <i>scaffold11G001150</i>  | expressed protein (XP_005843832, 6.69E-07)                                  | 8.378          |
| <i>scaffold11G001140</i>  | expressed protein (XP_005843832, 4.72E-06)                                  | 8.099          |
| <i>scaffold175G00150</i>  | late embryogenesis abundant protein homolog (AAA79745, 5.58E-22)            | 7.732          |
| <i>scaffold301G00550</i>  | antifreeze protein (ABR01229, 1.34E-14)                                     | 7.407          |
| <i>scaffold305G001070</i> | hypothetical protein CHLNCDRAFT_135268 (XP_005846770, 1.15E-25)             | 7.26           |
| <i>scaffold10G00510</i>   | copper amine oxidase (XP_002959097, 3.69E-179)                              | 7.074          |
| <i>scaffold301G00540</i>  | antifreeze protein (ABR01229, 3.39E-13)                                     | 6.782          |
| <i>scaffold164G00190</i>  | nitrate reductase (ACF22999, 0.00E+00)                                      | 6.351          |
| <i>scaffold25G001600</i>  | membrane protein containing DUF1538 (EHP30115.1, 6.13E-63)                  | 6.058          |
| <i>scaffold0G00550</i>    | (2Fe-2S)-binding protein (WP_006102543, 6.97E-54)                           | 5.909          |
| <i>scaffold80G00050</i>   | hypothetical protein CHLNCDRAFT_57598, partial (XP_005848440, 1.37E-165)    | 5.582          |
| <i>scaffold344G00160</i>  | protein serine/threonine kinase, putative, partial (XP_004185680, 1.73E-12) | 5.462          |

Supplementary Table 2. List of primers used in this study.

| Primer name                     | Sequences (5' to 3')                                                                         | Application       |
|---------------------------------|----------------------------------------------------------------------------------------------|-------------------|
| <i>CvUbi</i> -F                 | GAGTCTTCGGACACCATCGAG                                                                        | RT-PCR            |
| <i>CvUbi</i> -R                 | CTTGTCTGGTTGTACTTGCG                                                                         |                   |
| <i>CvAct1</i> -F                | ATGCTTTGCCACATGCCATC                                                                         | RT-PCR            |
| <i>CvAct1</i> -R                | CCGCTGTCTAGCACGATACC                                                                         |                   |
| <i>hG-CSF</i> -F                | TCTCTGCCACAGAGCTTCCT                                                                         | gDNA PCR & RT-PCR |
| <i>hG-CSF</i> -R                | CATCTGCTGCCAGATTGTTG                                                                         |                   |
| <i>CvNDI1</i> -F                | TGGTGTTCAATGCCCTGTGT                                                                         | RT-PCR            |
| <i>CvNDI1</i> -R                | GGAGGTCCATAGCAACCGAG                                                                         |                   |
| <i>CvNDI2</i> -F                | CGTGGTACCTCACAGGCTTT                                                                         | RT-PCR            |
| <i>CvNDI2</i> -R                | GCGACCACAGGGTAGACAAA                                                                         |                   |
| <i>scaffold73G00080</i> -F      | CTGTCACACGAGGTCAGCAA                                                                         | RT-PCR            |
| <i>scaffold73G00080</i> -R      | GTACCGCCGGTCATGTA                                                                            |                   |
| <i>scaffold37G001690</i> -F     | GCCAAGCCCAGAATCAGTGT                                                                         | RT-PCR            |
| <i>scaffold37G001690</i> -R     | TTGCATCTGCGTCTTTGTCG                                                                         |                   |
| <i>Bam</i> H I_UTEX395 SP_CSF-F | CGCGGATCCATGGCCGGCCGCATCACCTGCTGCTGTGCCTG<br>TGCTGGTGGCCGGCGCCGCCCATGGCAGCCCTCTC             | Cloning           |
| <i>Kpn</i> I_CSF-R              | GCCGGTACCGGGCTGTGCCAGG                                                                       | Cloning           |
| <i>Bam</i> H I_29B SP_CSF-F     | CGCGGATCCATGAAGGGCGCCCTGCTGCTGCTGCTGCTGGC<br>CCTGGCCGCCAGCGCCGCATCGCCCGGACATGGCAGCCCT<br>CTC | Cloning           |

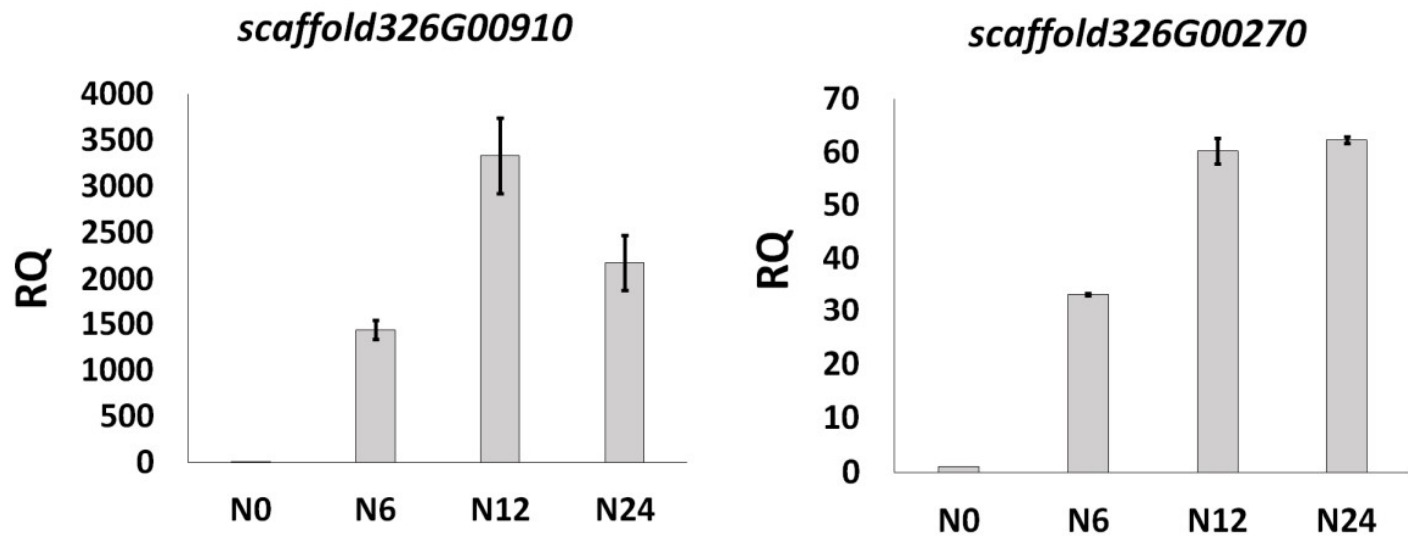

Supplementary Figure 1. RT-qPCR analysis of two candidate genes (*Scaffold326G00910* and *Scaffold326G00270*) detected in N deprived growth conditions after 0, 6, 12, and 24 h which are represented by N0, N6, N12 and N24. RQ indicates relative quantity, and error bars represent standard error of three replicates.





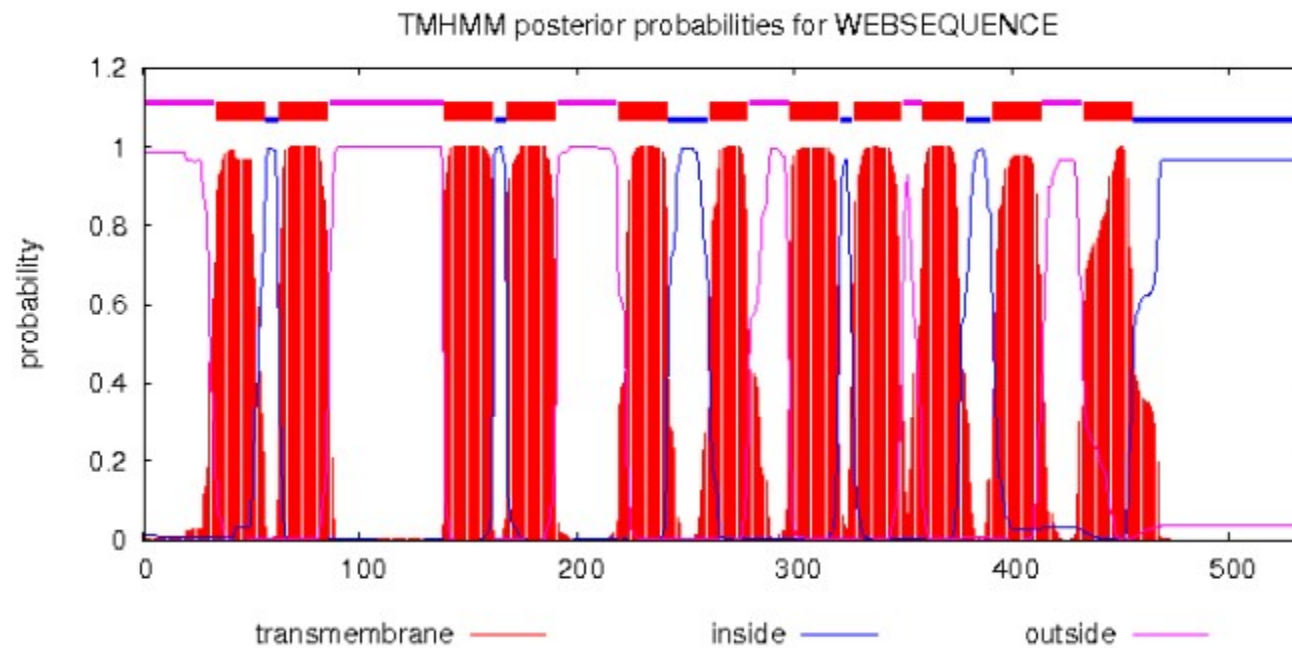

Supplementary Figure 3. (b) The hydropathy profile of CvNDI2. Red color indicates the transmembrane domain, and the inside and outside regions are in respectively blue and cyan.

>*CvNDI1* promoter

CGCGGTTGGCCACCAGCAGCTTGGTGATGGGAGCCTGGGTCATGGCGACTGGGTCTGCAG  
GGCAACGCGAGCAAAAAGGGAGCGGTTGAGCAGGCAGTGCCGCCGCCAGCTGCCGGGAGC  
GCAGGCAAGCGTTGGCCCGCATTGCCGGTGGCGCATCTGAAATGCCGGGTTGCGTGCGT  
GTGTGCTCACAACACGCTGACAGCGAAAACCGACGCAGAACCCACACAGGCCGGGGTGC  
CCCCCCCCCTTGCTGCGTCTGCCGGCCGCATCAGTTTATCATTGATGTCACGATGCA  
TGCAATTGCTATGAGGCCCTGCTCCCAAACTAGGGCTCTGCCCCGTGCATCACCTGCGC  
AGTCCCTCTCGGATGCGCAGGCGCACCACAATGGTGCCAATGCTGCAGAGAAGATACAA  
CCAAGAAGATAACAACCAAGAGGAGGAGAAGCGGCCATCGTTGGGTCCATCACCGACTGCC  
AGCTGGCTCCTCCCGCCGAATCCGCAACCCTTGCGCGGCACATCTGGAGACAGCTGGCA  
GCTGGCCTGTGCTCAACACGCCCTTTACCTATCCTCTTCGCCGCCACAATCAGTGTCCCA  
CATTTGTGAGTGCAAGCCGAGCCCAACCGGATTTTCAATTTACGCATGACCGCCTACACGCC  
TGCGGTTGCGGGCGCTGCGCTGCCGAGTGGTCACTCGTTTTTTACAGCGACCCACACCACG  
GCACTCTGTAGGGAGCATCAACTGAGCCCACCGTCGTCCGATCCCGTCAACATCACCTGG  
GGAAGCTGCTGCTGCCTGAAAAGGATGTGACCCTGGTACCAACTTTTCTGCCCCCTCTGAC  
GGGGCGGTGGTCTCTCATGCATTGGGTTACCCATATATTGCGCGGGCACACACTCCGCC  
CCCCATCTTTTCAACTCTCACTCCTCATCCCCAGGCACGTTGCCACCGCTCAGCAGGG  
CCGGGGAGCTCCCATCACCTTGCGAA

>*CvNDI2* promoter

GGGCTCTGGGTCCACCTGAAAAGTGGGTGCGCTTTGTGCTTGTTTCATCAAAGTTCTTTCA  
AGGGCAGATCGGAAGGCGTAACCTCTGCTAGCCATCTGCCTGCACCGCCTCCGCCACCAC  
CTCTACCCACTGGCCGCCATGTCTTCGAGACGGCATCATGATGGAATGGAATGTTACATG  
CATCAGTGATGCAAACAAGCCTACACAACCCATTATGTGCGCTGCGCTGATCAAGCTGGA  
TCCCCGTCCCCCTCGCACCCAGCACACCGCCAAGCAGTCCGCGATCCACCAATTCCTGC  
ACCAAGCCTCTGGGCAGCCTGTGGGCAGCCAGACCTTTGTACCACAGCACCGCAGCGCCA  
ACCTCGGCTGCCGACAGCCTTTGAGCGGCACTTGGCCCCGCCCTTGAGGCACCTTTGCGG  
CTGGCGTTGCTGCTGCTGCTGGTGTGTTTTCTGGTGTGCTGCTGCCCTCCCCGGGCTTGCC  
CTGCCGCCAGTTCTCGACACCGCTGCCGAGCCATGGCAGCAGCCCTGCTCGCAGGTGCC  
AGCACTAGGAGTGATAGGCAGCTTGCAGCCCCAGGCAGTCGATTACGGTATCTAACGCT  
GCAAGCCGTCGTTGATGGCAACGACTCAGCTGCAGCTGCTGGTTGCGAGCCATGCCCAGA  
GCCTCGAGCTTGGCAGCGCTGCAGGCAACAGGCAGGGCGCGGCACAGTTGCTGACATCAG  
CACAGCAGCGCAACAGCGTCATGTTGCACTGCAGCAACTCCTCAACACTCGACTGCACAG  
CTGGCCACAGCCGTGCACGCTTTGCCACATGCCGCACAGCACAACACACATACCGGTCTG  
GCGCCAGCCTGCCCGCTGCCACTGGTGCAGCTGGAACGAGGCCAGGCACGCAAGCCGT  
CGCCGGCAGGGAGAGGTGCGCTCAGCAGGTCCCCATCACGCTGCTGGTGCAGCTCACAGA  
GCTGAGTGTAGCGGCGTCCCACCGGCCCTCCCTTGGGT

Supplementary Figure 4. Promoter sequences of *CvNDI1* and *CvNDI2* genes.



>Cellulase (UTEX 395)

**MAGRI**LLLLCLCLVAGAAAAPIDAATACSKMPATWKPVETVPDEVSWAVYSAA YDRY  
AGSGLDIDWTSYYCAEPTYSYDGCYAVSSTPLLARLPAR

>Ras-related RABF1 (ArM0029B)

**MKGAL**LLLLLLALAASAAIAARDLETWGHGKKKVKVVPVVVKPKPVVVVKPKPVVVVK  
PKPVVVVKPKPAVVVVAKPEQKYPVCDGAVLASCCYLPIQYDYYGKAASTCKIVDKVA  
VPIHPWYPPKMVAKEVVKHLYLASYPVPVYTDGASFACVCPTACEVPSPCSPYPCTVH  
MPDCGGYGK

Supplementary Figure 5. Amino acid sequences of cellulase and Ras-related RABF1. Bold letters indicate predicted signal peptide sequences.
