# Supplementary material for: The establishment of new protein expression system using N starvation inducible promoters in Chlorella
Source: PubMed Central journal article supplement (PMC7391781; doi:10.1038/s41598-020-69620-9), 2020-07-29
Supplement: 41598_2020_69620_MOESM2_ESM.pdf [file 41598_2020_69620_MOESM2_ESM.pdf]

# **The establishment of new protein expression system using N starvation inducible promoters in *Chlorella***

Jun-Hye Shin<sup>1</sup>, Juyoung Choi<sup>1</sup>, Jeongmin Jeon<sup>1</sup>, Manu Kumar<sup>1</sup>, Juhyeon Lee<sup>1</sup>, Won-Joong Jeong<sup>2</sup>, Seong-Ryong Kim<sup>1\*</sup>

<sup>1</sup>Department of Life Science, Sogang University, Seoul, South Korea

<sup>2</sup>Korea Research Institute of Bioscience and Biotechnology, Daejeon, South Korea

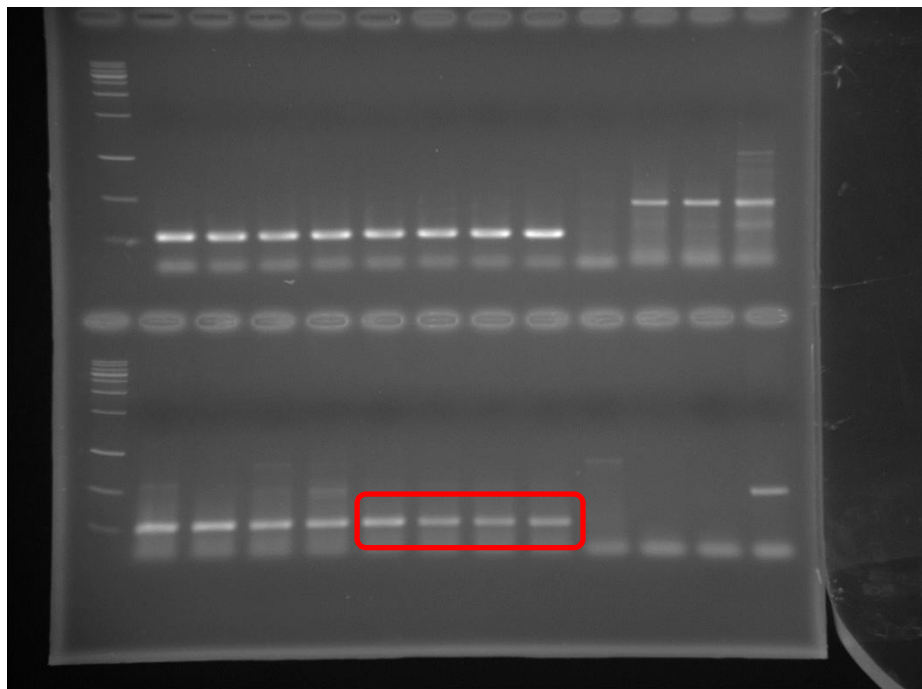

Fig 1\_CvAct1

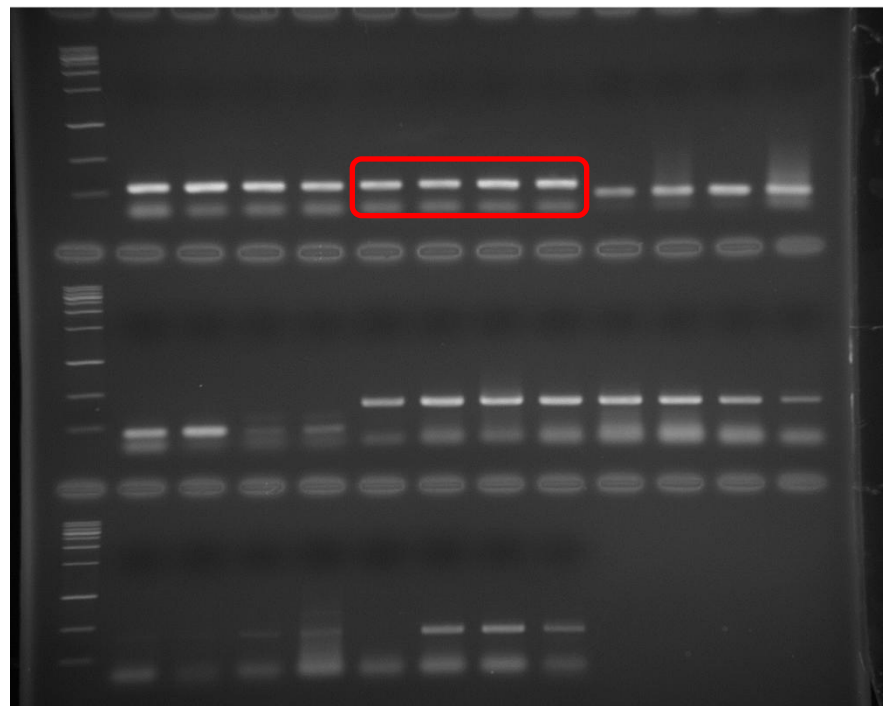

Fig 1\_C.Ubi

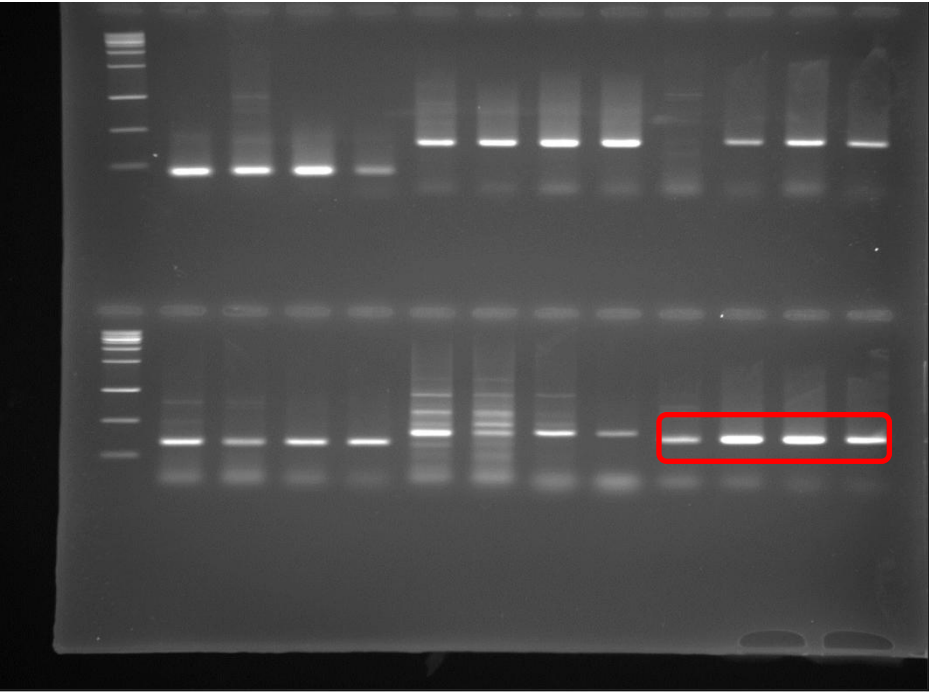

Fig 1\_Scaffold326G00910

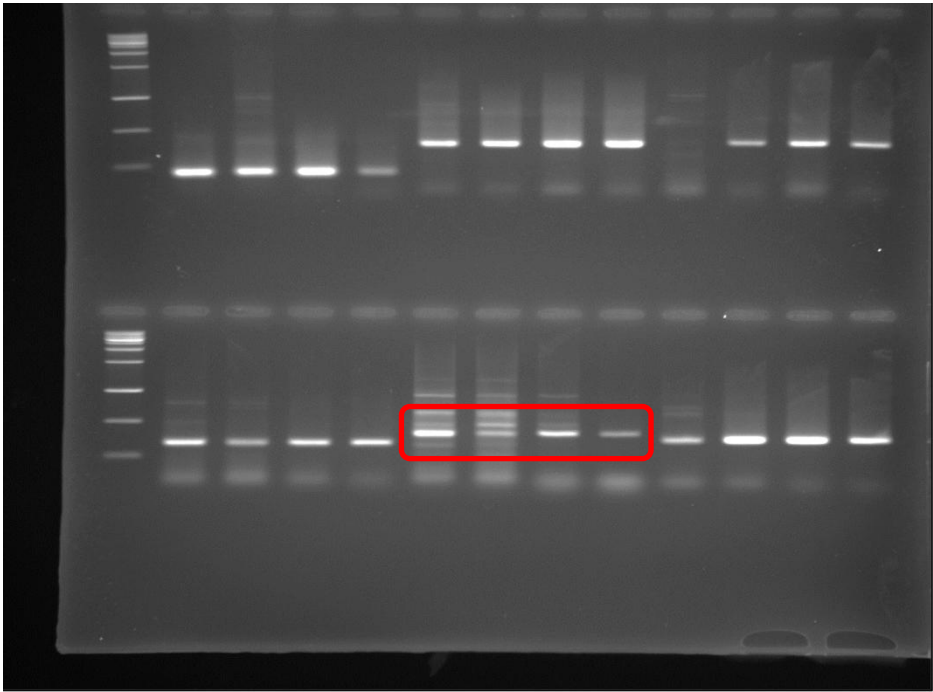

Fig 1\_Scaffold73G00080

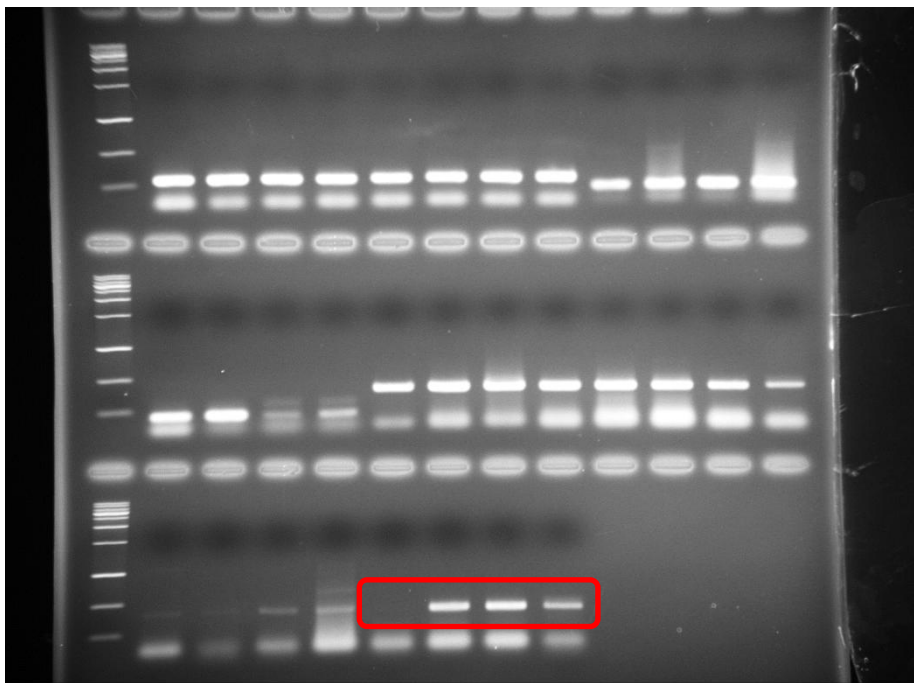

Fig 1\_Scaffold326G00270

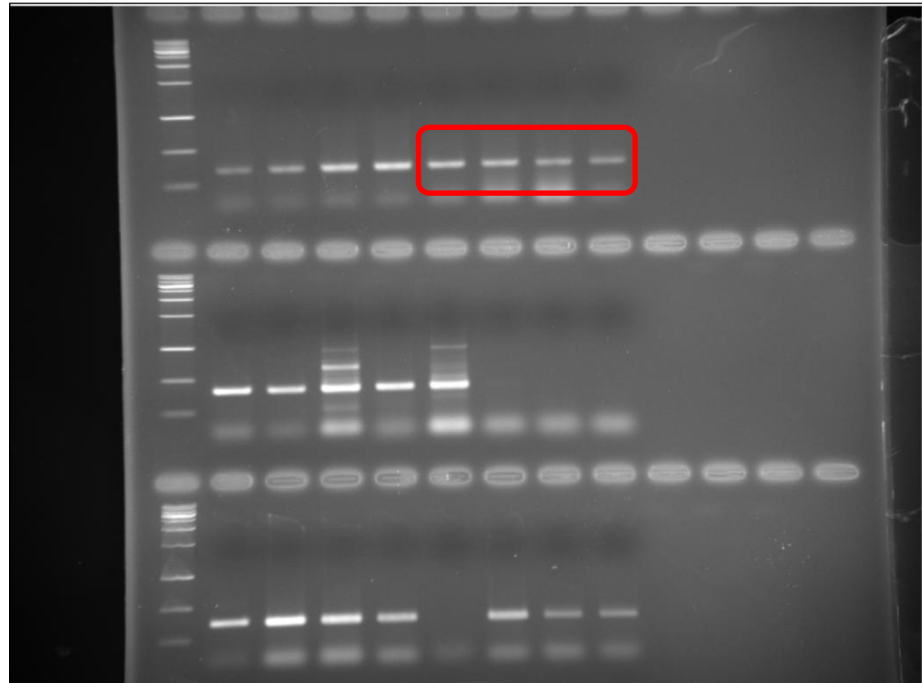

Fig 1\_Scaffold37G001690

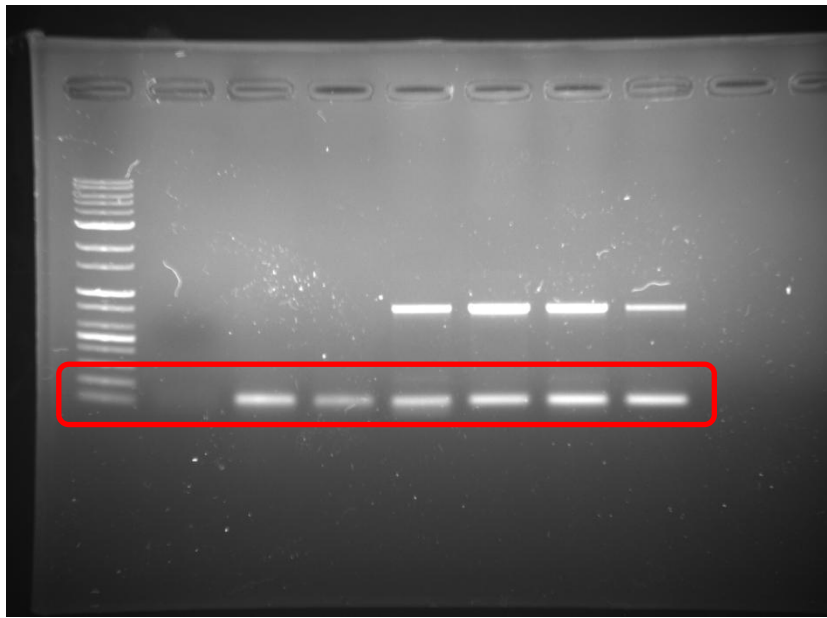

Fig 3a\_UTEX395 PCR

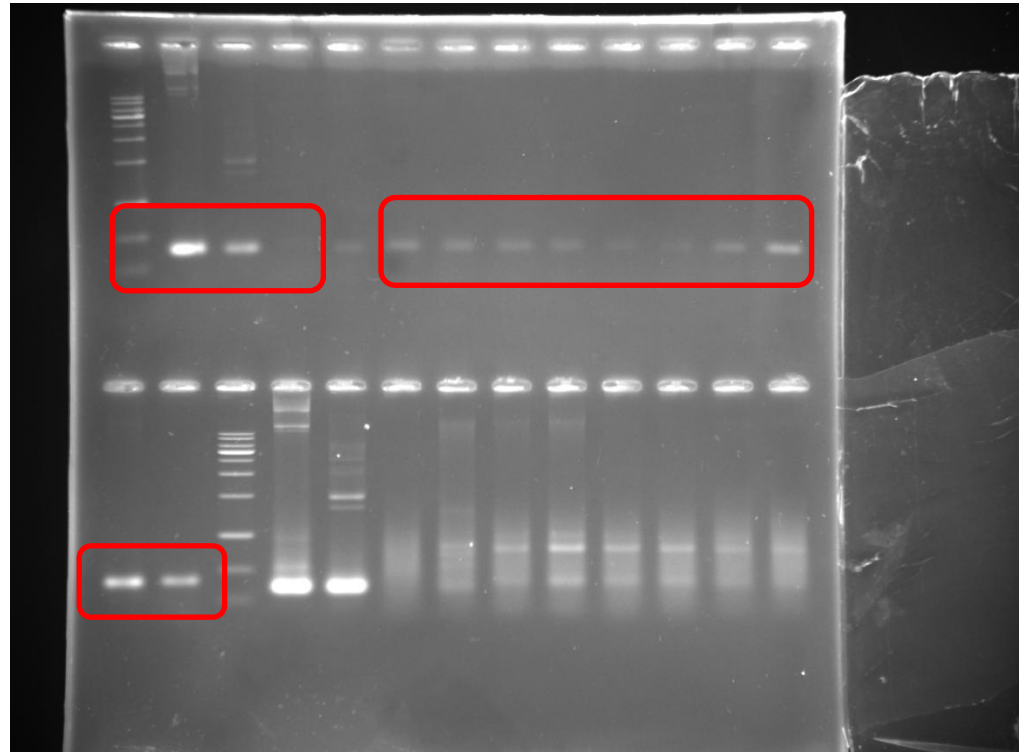

Fig 3a\_ArM0029B PCR

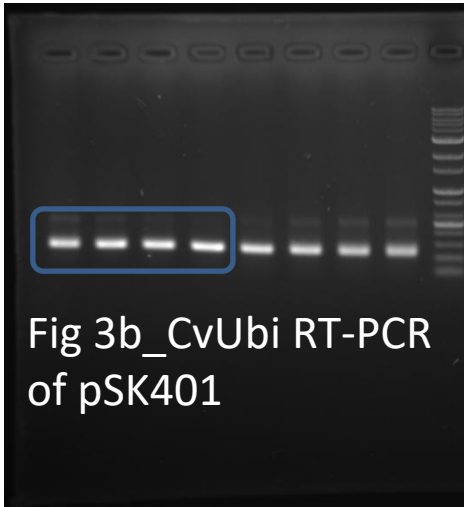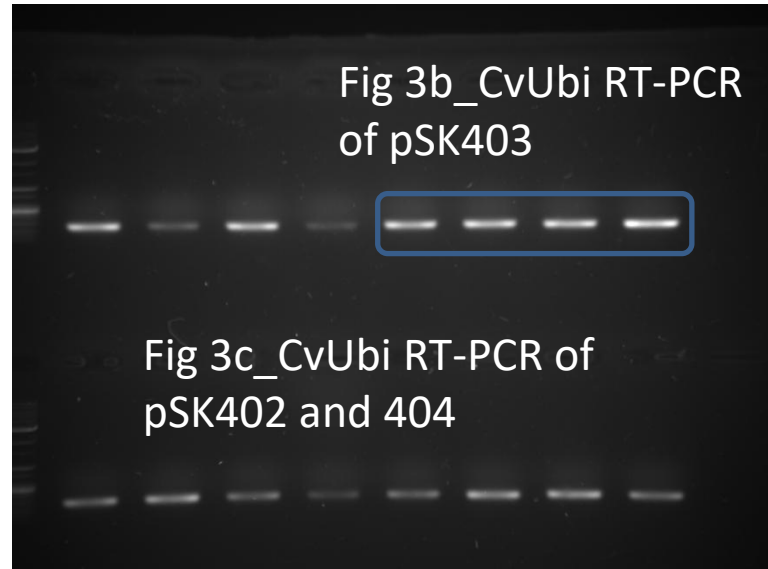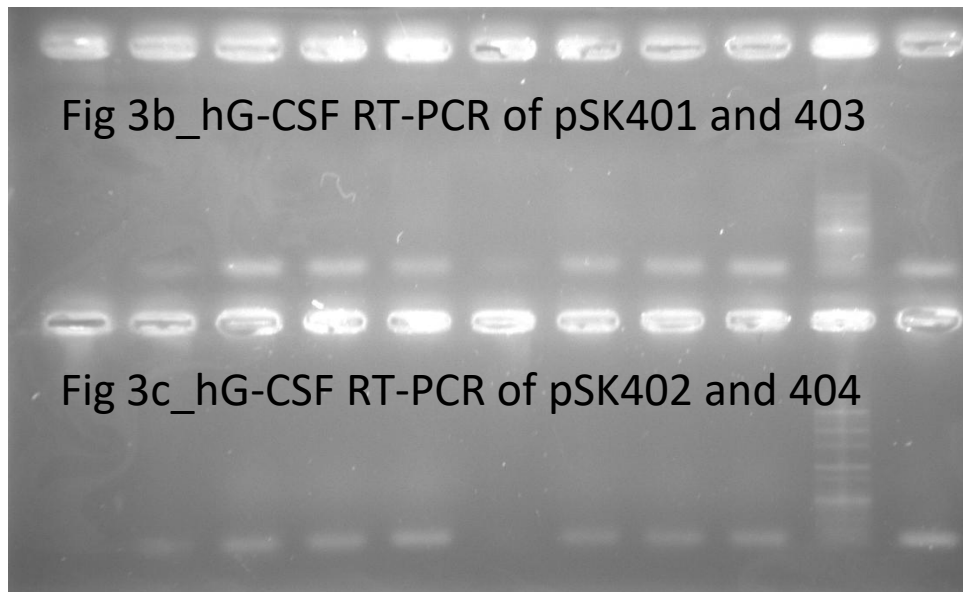

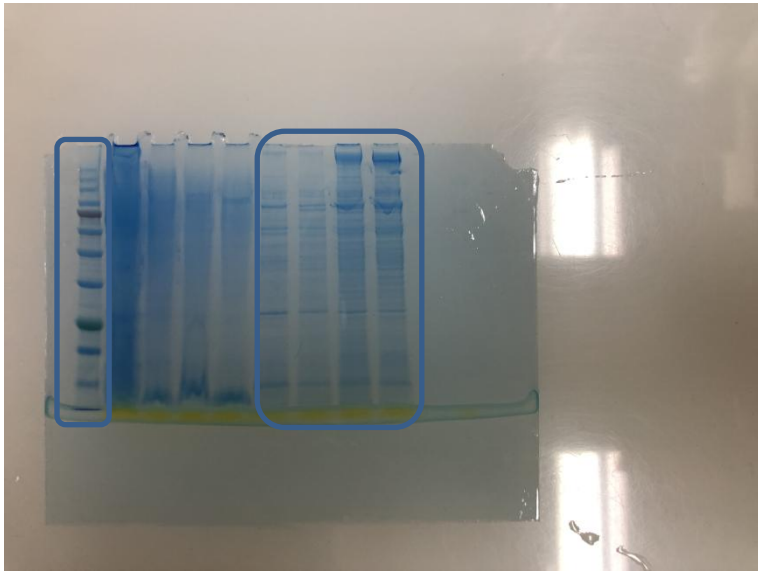

Fig 4a\_left panel

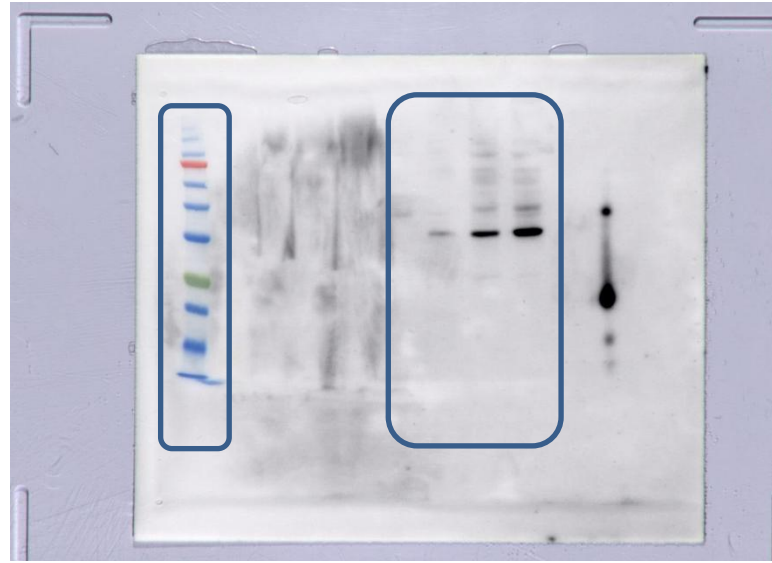

Fig 4a\_right panel

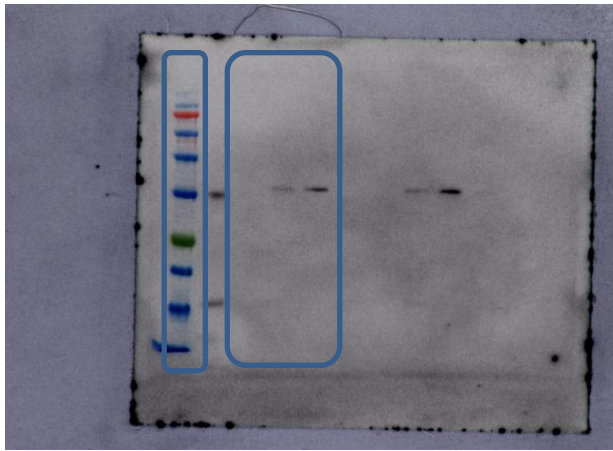

Fig 4b\_left panel

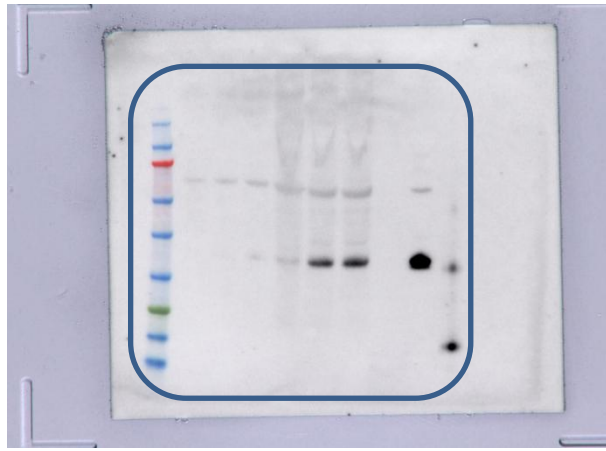

Fig 4b\_middle panel

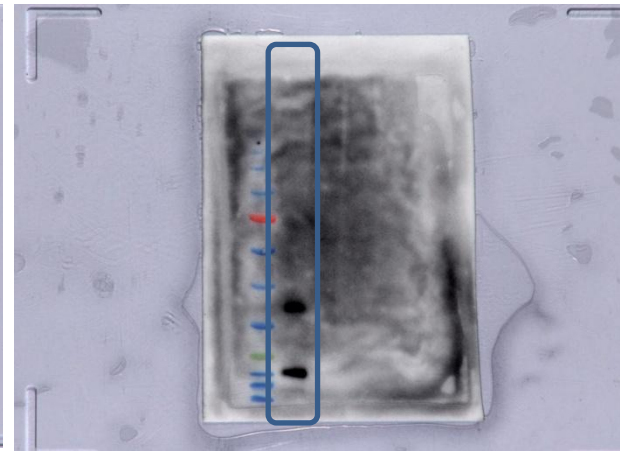

Fig 4b\_C3' in middle panel

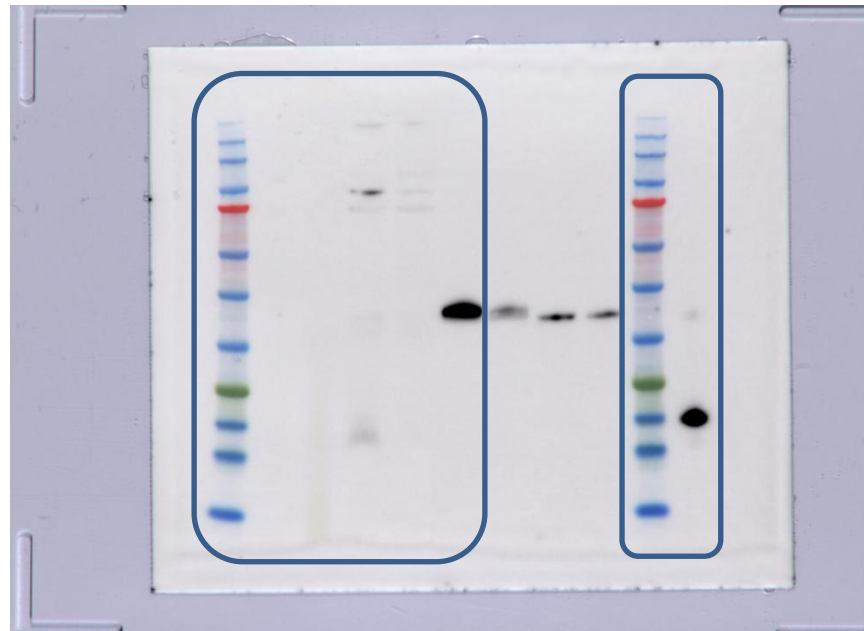

Fig 4c
